# Supplementary material for: An assessment of vapour pressure estimation methods
Source: Royal Society of Chemistry journal article supplement (doi:10.1039/c4cp00857j), 2014-01-01
Supplement: c4cp00857j1.pdf [file c4cp00857j1.pdf]

## Supplementary Material for 'An Assessment of Vapour Pressure Estimation Methods'

90 compounds comprised the test set, they are listed in table 1, along with their CAS code, literature source, vapour pressure, temperature range and the source for their parent hydrocarbon vapour pressure, if this were found in the literature. Also listed are the sources for enthalpies of fusion, heat capacities for the solid and liquid state, and melting temperature, when these were found in the literature.

| Compound                              | CAS code  | $P_{lors}^0$ Source | $P_l^0$ (Pa) range              | T range (K)                   | $P_{hc}^0$ (Pa)✦ | $\Delta H_{fus}$ | $\Delta C_p$ | $T_m$    |
|---------------------------------------|-----------|---------------------|---------------------------------|-------------------------------|------------------|------------------|--------------|----------|
| Tridecanoic acid                      | 638-53-9  | <i>a</i>            | 2.87E-3                         | 298.15                        | <i>b</i>         | <i>c</i>         | <i>c</i>     | <i>d</i> |
| Tetradecanoic acid                    | 544-63-8  | <i>a</i>            | 1.46E-3                         | 298.15                        | <i>e</i>         | <i>c</i>         | <i>c</i>     | <i>d</i> |
| Pentadecanoic acid                    | 1002-84-2 | <i>a</i>            | 6.98E-4                         | 298.15                        | <i>b</i>         | <i>c</i>         | <i>c</i>     | <i>d</i> |
| Hexadecanoic acid                     | 57-10-3   | <i>a</i>            | 2.97E-4                         | 298.15                        | <i>e</i>         | <i>f</i>         | <i>f</i>     | <i>d</i> |
| Heptadecanoic acid                    | 506-12-7  | <i>a</i>            | 1.88E-4                         | 298.15                        | <i>b</i>         | <i>c</i>         | <i>c</i>     | <i>d</i> |
| Octadecanoic acid                     | 57-11-4   | <i>a</i>            | 6.61E-5                         | 298.15                        | <i>g</i>         | <i>f</i>         | <i>f</i>     | <i>d</i> |
| Nonadecanoic acid                     | 646-30-0  | <i>a</i>            | 3.32E-5                         | 298.15                        | <i>e/b</i>       | <i>c</i>         | <i>c</i>     | <i>d</i> |
| Eicosanoic acid                       | 506-30-9  | <i>a</i>            | 1.34E-5                         | 298.15                        | <i>g/h</i>       | <i>c</i>         | <i>c</i>     | <i>i</i> |
| Oxalic acid                           | 144-62-7  | <i>j</i>            | 2.74E-2                         | 298.00                        | <i>k</i>         | <i>j</i>         | <i>j</i>     | <i>j</i> |
| Malonic acid                          | 141-82-2  | <i>j/l/m</i>        | 3.19E-3/3.73E-1-357.494/2.07E-3 | 298.00/339.299-357.494/296.00 | <i>n</i>         | <i>j</i>         | <i>j</i>     | <i>j</i> |
| 2-methyl malonic acid                 | 516-05-2  | <i>j/o</i>          | 5.34E-3/1.44E-1                 | 298.00/298.00                 | <i>p</i>         | <i>j</i>         | <i>j</i>     | <i>j</i> |
| 2-hydroxy malonic acid                | 80-69-3   | <i>j</i>            | 5.64E-3                         | 298.00                        | <i>n</i>         | <i>j</i>         | <i>j</i>     | <i>j</i> |
| Succinic acid                         | 110-15-6  | <i>j/q/m</i>        | 3.86E-3/1.21-4.30/1.39E-3       | 298.00/360.106-375.135/296.00 | <i>r/s</i>       | <i>j</i>         | <i>j</i>     | <i>j</i> |
| 2-methyl succinic acid                | 498-21-5  | <i>j/q/o</i>        | 5.58E-4/2.40E-1-1.76/3.51E-3    | 298.00/343.119-360.112/298.00 | <i>t</i>         | <i>j</i>         | <i>j</i>     | <i>j</i> |
| 2-methyl, 2-hydroxy succinic acid     | 6236-10-8 | <i>j</i>            | 7.48E-3                         | 298.00                        | <i>t</i>         | <i>j</i>         | <i>j</i>     | <i>j</i> |
| 2-hydroxy succinic acid               | 6915-15-7 | <i>j</i>            | 8.72E-4                         | 298.00                        | <i>r/s</i>       | <i>j</i>         | <i>j</i>     | <i>j</i> |
| 2,3-dihydroxy succinic acid           | 133-37-9  | <i>j</i>            | 3.23E-1                         | 298.00                        | <i>r/s</i>       | <i>j</i>         | <i>j</i>     | <i>j</i> |
| 2-amino succinic acid                 | 56-84-8   | <i>j</i>            | 2.56E-2                         | 298.00                        | N/A              | <i>j</i>         | <i>j</i>     | <i>j</i> |
| 2-keto succinic acid                  | 328-42-7  | <i>j</i>            | 1.67E-2                         | 298.00                        | <i>r/s</i>       | <i>j</i>         | <i>j</i>     | <i>j</i> |
| Glutaric acid                         | 110-94-1  | <i>j/l/m</i>        | 1.96E-3/0.3404-1.334/3.3E-3     | 298.00/348.150-363.149/296.00 | <i>u</i>         | <i>v</i>         | <i>v</i>     | <i>j</i> |
| 2-methyl glutaric acid                | 617-62-9  | <i>j/q</i>          | 9.63E-4/1.28E-1-4.299E-1        | 298.00/338.378-347.643        | <i>LK_P</i>      | <i>j</i>         | <i>j</i>     | <i>j</i> |
| 3-methyl glutaric acid                | 626-51-7  | <i>j/o</i>          | 9.19E-4/3.8E-3                  | 298.00/298.00                 | <i>LK_P</i>      | <i>j</i>         | <i>j</i>     | <i>j</i> |
| 3-carboxylic, 3-hydroxy glutaric acid | 77-92-9   | <i>j</i>            | 3.10E-3                         | 298.00                        | <i>LK_P</i>      | <i>j</i>         | <i>j</i>     | <i>j</i> |
| 2-amino glutaric acid                 | 56-86-0   | <i>j</i>            | 2.05E-3                         | 298.00                        | N/A              | <i>j</i>         | <i>j</i>     | <i>j</i> |
| 2-keto glutaric acid                  | 328-50-7  | <i>j</i>            | 2.02E-3                         | 298.00                        | <i>u</i>         | <i>j</i>         | <i>j</i>     | <i>j</i> |
| 3-keto glutaric acid                  | 542-05-2  | <i>j</i>            | 3.22E-3                         | 298.00                        | <i>u</i>         | <i>j</i>         | <i>j</i>     | <i>j</i> |
| Adipic acid                           | 124-04-9  | <i>j/m/o</i>        | 2.14E-4/3.7E-4/5.7E-4           | 298.00/296.00/298.00          | <i>u</i>         | <i>v</i>         | <i>v</i>     | <i>j</i> |
| Suberic acid                          | 505-48-6  | <i>v/m</i>          | 2.23E-5/2.4E-5                  | 298.00/296.00                 | <i>b</i>         | <i>w</i>         | <i>w</i>     | <i>w</i> |
| <i>ortho</i> -phthalic acid           | 88-99-3   | <i>x</i>            | 1.68E-3                         | 298.00                        | N/A              | <i>x</i>         | <i>x</i>     | <i>x</i> |
| <i>meta</i> -isophthalic acid         | 121-91-5  | <i>x</i>            | 1.40E-2                         | 298.00                        | N/A              | <i>x</i>         | <i>x</i>     | <i>x</i> |
| <i>para</i> -terephthalic acid        | 100-21-0  | <i>x</i>            | 1.38E-1                         | 298.00                        | N/A              | <i>y</i>         | <i>y</i>     | <i>y</i> |
| 1,1-cyclopropane dicarboxylic acid    | 598-10-7  | <i>v</i>            | 3.10E-3                         | 298.00                        | <i>LK_P</i>      | <i>v</i>         | <i>v</i>     | <i>v</i> |
| 1,1-cyclobutane dicarboxylic acid     | 5445-51-2 | <i>v</i>            | 6.47E-3                         | 298.00                        | <i>LK_P</i>      | <i>v</i>         | <i>v</i>     | <i>v</i> |
| 1,2-cyclopentane dicarboxylic acid    | 1461-96-7 | <i>v</i>            | 3.47E-4                         | 298.00                        | <i>LK_P</i>      | <i>v</i>         | <i>v</i>     | <i>v</i> |

|                                           |             |                 |                          |                        |            |                |                 |                |
|-------------------------------------------|-------------|-----------------|--------------------------|------------------------|------------|----------------|-----------------|----------------|
| 1,3-cyclohexane dicarboxylic acid         | 3971-31-1   | <i>v</i>        | 4.60E-4                  | 298.00                 | LK_P       | <i>v</i>       | <i>v</i>        | <i>v</i>       |
| Azelaic acid                              | 123-99-9    | <i>l/m</i>      | 1.287E-1-3.722E-1/8.1E-5 | 367.062-377.038/296.00 | <i>b</i>   | <i>z</i>       | <i>z</i>        | <i>l</i>       |
| Undecanedioic acid                        | 1852-04-6   | <i>l</i>        | 7.933E-2-2.146E-1        | 371.184-380.925        | <i>b</i>   | <i>z</i>       | <i>z</i>        | <i>l</i>       |
| Dodecanedioic acid                        | 1852-04-6   | <i>a</i>        | 2.27E-4                  | 298.00                 | <i>b</i>   | <i>z</i>       | <i>z</i>        | <i>z</i>       |
| <i>cis</i> -pinonic acid                  | 473-72-3    | <i>v</i>        | 7.78E-4                  | 298.00                 | LK_P       | <i>v</i>       | <i>v</i>        | <i>v</i>       |
| <i>para</i> -anisic acid                  | 100-09-4    | <i>x</i>        | 4.76E-3                  | 298.00                 | N/A        | <i>x</i>       | <i>x</i>        | <i>x</i>       |
| Vanillic acid                             | 121-34-6    | <i>x</i>        | 1.42E-3                  | 298.00                 | N/A        | <i>x</i>       | <i>x</i>        | <i>x</i>       |
| Syringic acid                             | 530-57-4    | <i>x</i>        | 9.80E-4                  | 298.00                 | N/A        | <i>x</i>       | <i>x</i>        | <i>x</i>       |
| Nitrocatechol                             | 3316-09-4   | <i>x</i>        | 9.99E-4                  | 298.00                 | N/A        | <i>x</i>       | <i>x</i>        | <i>x</i>       |
| Levoglucofan                              | 498-07-7    | <i>v</i>        | 1.35E-4                  | 298.00                 | N/A        | <i>v</i>       | <i>v</i>        | <i>v</i>       |
| <i>ortho</i> -dimethyl amino benzoic acid | 610-16-2    | <i>x</i>        | 1.07E-2                  | 298.00                 | N/A        | <i>x</i>       | <i>x</i>        | <i>x</i>       |
| <i>meta</i> -dimethyl amino benzoic acid  | 99-64-9     | <i>x</i>        | 6.42E-4                  | 298.00                 | N/A        | <i>x</i>       | <i>x</i>        | <i>x</i>       |
| 1,2-pentanediol                           | 5345-92-0   | <i>a1</i>       | 1.35-98.44               | 289.2-336.2            | <i>u</i>   | N/A            | N/A             | N/A            |
| 1,2,3-trihydroxypropane                   | 56-81-5     | <i>a2</i>       | 0.0249-1.97              | 298.75-341.35          | <i>n</i>   | N/A            | N/A             | N/A            |
| 1,4-butanediol                            | 110-63-4    | <i>a3</i>       | 13.85-84.55              | 329.2-351.2            | <i>r/s</i> | N/A            | N/A             |                |
| 2-(methylamino)ethanol                    | 109-83-1    | <i>a4</i>       | 13.94 - 92.12            | 274.9-296.3            | N/A        | N/A            | N/A             | N/A            |
| 2,4-pentanediol                           | 625-69-4    | <i>a5</i>       | 4.8-87.35                | 297.2-330.5            | <i>u</i>   | N/A            | N/A             | N/A            |
| 2,6-dinitrotoluene                        | 606-20-2    | <i>a6</i>       | 0.0127-1.974             | 277.15-323.15          | N/A        | <i>a7</i>      | <i>a7</i>       | <i>a7</i>      |
| 2-aminoethanol                            | 141-43-5    | <i>a4</i>       | 8.48-83.66               | 279.0-306.3            | N/A        | N/A            | N/A             | <i>a4</i>      |
| 2-aminonitrobenzene                       | 88-74-4     | <i>a8</i>       | 1.20-12.37               | 313.5-342.3            | N/A        | <i>a9</i>      | <i>a9</i>       | <i>a9</i>      |
| 2-chloro-3,5-dimethoxy-4-HBA              | 76341-69-0  | <i>a10</i>      | 0.046-0.9                | 293.15-323.15          | N/A        | N/A            | N/A             | N/A            |
| 2-chloropropionic acid                    | 598-78-7    | <i>a11</i>      | 13.36-82.72              | 287.4-308.4            | N/A        | N/A            | N/A             | N/A            |
| 2-hydroxybenzoic acid                     | 69-72-7     | <i>a12</i>      | 0.443-2.434              | 307.05-323.71          | N/A        | <i>a9</i>      | <i>a9</i>       | <i>a9</i>      |
| 2-phenylbromide-TEGMME                    | 929259-37-0 | <i>a13</i>      | 0.061-1.446              | 333.2-369.9            | N/A        | N/A            | N/A             | N/A            |
| 3-(2-methoxyphenyl)PA                     | 6342-77-4   | <i>a14</i>      | 0.329-1.514              | 331.156-347.165        | N/A        | <i>a14</i>     | N/A             | <i>a14</i>     |
| 3-(3,4-dimethoxyphenyl)PA                 | 2107-70-2   | <i>a14</i>      | 0.1159-0.4707            | 352.178-366.163        | N/A        | <i>a13</i>     | N/A             | <i>a14</i>     |
| 3,4-dichloronitrobenzene                  | 99-54-7     | <i>a15</i>      | 9.1-74.69                | 316.3-346.5            | N/A        | N/A            | N/A             | <i>a15</i>     |
| 3,4-dihydroxychlorobenzene                | 99-54-7     | <i>a10</i>      | 0.6-8.7                  | 293.15-323.15          | N/A        | N/A            | N/A             | <i>a16</i>     |
| 3,5-di-tert-butylcatechol                 | 1020-31-1   | <i>a17</i>      | 0.270-5.58               | 313.2-346.2            | N/A        | <i>a17</i>     | <i>est</i>      | <i>a17</i>     |
| 3,7-dimethyl-7-hydroxyoctanol             | 107-75-5    | <i>a17, a18</i> | 0.117-15.87              | 283.355-332.65         | LK_P       | N/A            | N/A             | N/A            |
| 3-chloro-2,6-dimethoxyphenol              | 18113-22-9  | <i>a10</i>      | 0.52-7.1                 | 293.15-323.15          | N/A        | N/A            | N/A             | <i>a19</i>     |
| 3-chloroaminobenzene                      | 108-42-9    | <i>a15</i>      | 6.02-76.82               | 291.2-325.3            | N/A        | N/A            | N/A             | <i>a15</i>     |
| 3-hydroxypropanenitrile                   | 109-78-4    | <i>a20</i>      | 15.64-91.47              | 306.3-331.4            | N/A        | N/A            | N/A             | <i>a21</i>     |
| 3-nitro-3-(4-nitrophenyl)-pentane         | 204189-06-0 | <i>a8</i>       | 0.063-1.920              | 321.4-358.1            | N/A        | N/A            | N/A             | N/A            |
| 3-nitrobenzoic acid                       | 121-92-6    | <i>a22</i>      | 0.604-2.03               | 347.16-361.16          | N/A        | <i>a9, a23</i> | <i>a24, est</i> | <i>a9</i>      |
| 3-nitrophenol                             | 554-84-7    | <i>a25</i>      | 14.74-35.51              | 357.2-369.3            | N/A        | <i>a25</i>     | N/A             | <i>a25</i>     |
| 4-aminobenzoic acid                       | 150-13-0    | <i>a26</i>      | 0.28-2.31                | 359.14-382.56          | N/A        | <i>a9</i>      | <i>est.</i>     | <i>a9, a27</i> |
| Anisaldehyde                              | 123-11-5    | <i>a17, a18</i> | 1.32-30.4                | 283.95-322.95          | N/A        | N/A            | N/A             | <i>a28</i>     |
| Benzyl salicylate                         | 118-58-1    | <i>a17, a18</i> | 0.016-1.24               | 295.45-342.95          | N/A        | N/A            | N/A             | <i>a17</i>     |
| Dibutyl phthalate                         | 84-74-2     | <i>a29</i>      | 0.00191-0.0335           | 293.05-317.15          | N/A        | N/A            | N/A             | <i>a30</i>     |
| Ethyl vanillin                            | 121-32-4    | <i>a18, a31</i> | 0.96-3.78                | 323.35-337.45          | N/A        | <i>a32</i>     | N/A             | <i>a32</i>     |
| Eugenol                                   | 97-53-0     | <i>a18, a33</i> | 0.64-20.00               | 285.45-326.75          | N/A        | N/A            | N/A             | <i>a21</i>     |

|                                      |            |                 |                                 |                               |          |               |               |                 |
|--------------------------------------|------------|-----------------|---------------------------------|-------------------------------|----------|---------------|---------------|-----------------|
| Glycerine carbonate                  | 931-40-8   | <i>a34</i>      | 0.29-46.94                      | 330.2-398.5                   | N/A      | N/A           | N/A           | N/A             |
| Heliotropin                          | 120-57-0   | <i>a18, a31</i> | 0.58-11.60                      | 293.45-326.85                 | N/A      | est           | N/A           | <i>a18</i>      |
| Isoamyl salicylate                   | 87-20-7    | <i>a17, a18</i> | 0.22-8.93                       | 287.95-328.55                 | N/A      | N/A           | N/A           | N/A             |
| 1'-hydroxy-1,1'-bi(cyclohexyl)-2-one | 28746-99-8 | <i>a35</i>      | 1.23-6.64                       | 308.22-330.4                  | LK_P     | N/A           | N/A           | <i>a35</i>      |
| Methyl anthranilate                  | 134-20-3   | <i>a18, a36</i> | 2.32-13.73                      | 299.45-319.15                 | N/A      | N/A           | N/A           | <i>a18, a36</i> |
| Musk Ambrette                        | 83-66-9    | <i>a18, a31</i> | 0.303-1.33                      | 328.55-345.45                 | N/A      | est           | N/A           | <i>a18, a31</i> |
| N-methyldiethanolamine               | 105-59-9   | <i>a37</i>      | 0.61-80.9                       | 293.69-353.0                  | N/A      | N/A           | N/A           | N/A             |
| 1-(4-Methoxyphenyl)ethanone          | 100-06-1   | <i>a36</i>      | 5.60-25.5                       | 313.55-333.45                 | N/A      | N/A           | N/A           | <i>a36</i>      |
| 1,3,5-benzenetriol                   | 108-73-6   | <i>a38</i>      | 0.82-5.06                       | 381.31-404.58                 | N/A      | <i>a1</i>     | est           | <i>a1</i>       |
| Pimelic acid                         | 111-16-0   | <i>v/l/m</i>    | 2.6E-4/1.928E-1-7.761E-1/3.4E-4 | 298.00/358.149-371.656/296.00 | <i>b</i> | <i>w, a39</i> | <i>w, a39</i> | <i>l, a39</i>   |
| Pinonaldehyde                        | 2704-78-1  | <i>a40</i>      | 0.09-0.6                        | 263.15-278.15                 | LK_P     | N/A           | N/A           | N/A             |
| Tetraethylene glycol                 | 112-60-7   | <i>a41</i>      | 0.173-44.7                      | 323.23-398.23                 | N/A      | N/A           | N/A           | <i>a21</i>      |
| Triacetin                            | 102-76-1   | <i>a42</i>      | 0.0512-2.081                    | 284.2-318.2                   | N/A      | N/A           | N/A           | <i>a21</i>      |
| Triethylene glycol dinitrate         | 111-22-8   | <i>a42</i>      | 0.025-2.21                      | 303.4-348.0                   | N/A      | N/A           | N/A           | N/A             |

Table 1:  $a$  = Chattopadhyay and Ziemann (2005),  $b$  = Ambrose and Walton (1989),  $c$  = Schaake et al. (1982a),  $d$ =Gaikwad and Subrahmanymam (1985),  $e$  = Morgan and Kobayashi (1994),  $f$  = Schaake et al. (1982b),  $g$  = Macknick and Prausnitz (1979),  $h$  = Chirico et al. (1989),  $i$  = Adriaanse et al. (1964),  $j$  = Booth et al. (2010),  $k$ =Straty and Tsumura (1976),  $l$ =da Silva et al. (1999b),  $m$ = Bilde et al. (2003),  $n$  = Kratzke (1980),  $o$  = Mønster et al. (2004),  $p$  = Aston et al. (1940),  $q$  = da Silva et al. (2001),  $r$  = Flebbe et al. (1982),  $s$  = Martínez-Ortiz and Manley (1978),  $t$  = Schumann et al. (1942),  $u$  = Ewing and Ochoa (2006),  $v$  = Booth et al. (2011),  $LK_P$  = Reid et al. (1987),  $w$  = Roux et al. (2005),  $x$  = Booth et al. (2012),  $y$  = Huang et al. (2009),  $z$  = Cingolani and Berchiesi (1974),  $a1$  = Verevkin (2004),  $a2$  = Cammenga et al. (1977),  $a3$  = Vasiltsova et al. (2005),  $a4$  = Kapteina et al. (2005),  $a5$  = Verevkin (2007),  $a6$  = Pella (1977),  $a7$  = Finch and Payne (1990),  $a8$  = Verevkin (1997),  $a9$  = Domalski and Hearing (2006),  $a10$  = Lei et al. (1999),  $a11$  = Lagoa et al. (2002),  $a12$  = Colomina (1981),  $a13$  = Dabrowska et al. (2006),  $a14$  = Monte and Hillesheim (2001),  $a15$  = Verevkin and Schick (2003),  $a16$  = Parke and Williams (1955),  $a17$  = Serpinskii et al. (1955),  $a18$  = Serpinskii et al. (1958),  $a19$  = Varhanickova et al. (1958),  $a20$  = Roux et al. (2007),  $a21$  = Dykyi and Repas (1979),  $a22$  = da Silva et al. (1999a),  $a23$  = Rai and Mandal (1990),  $a24$  = Andrews (1926),  $a25$  = Heintz et al. (2007),  $a26$  = Dekruif et al. (1979),  $a27$  = Andrews et al. (1926),  $a28$  = Kendall and Gibbons (1915),  $a29$  = Birks and Bradley (1949),  $a30$  = Song et al. (2003),  $a31$  = Serpinskii et al. (1953),  $a32$  = Skerget et al. (2005),  $a33$  = Serpinskii et al. (1957),  $a34$  = Verevkin et al. (2008),  $a35$  = Shevelyova et al. (2006),  $a36$  = Serpinskii et al. (1954),  $a37$  = Noll (1998),  $a38$  = de Wit et al. (1983),  $a39$  = Steele et al. (2002),  $a40$  = Hallquist et al. (1997),  $a41$  = Hales et al. (1981),  $a42$  = Woodman and Adicoff (1963). ♣ N/A denotes chemicals that have a group not specified in the Capouet and Muller (2006) method and thus do not require  $P_{hc}^0$ .

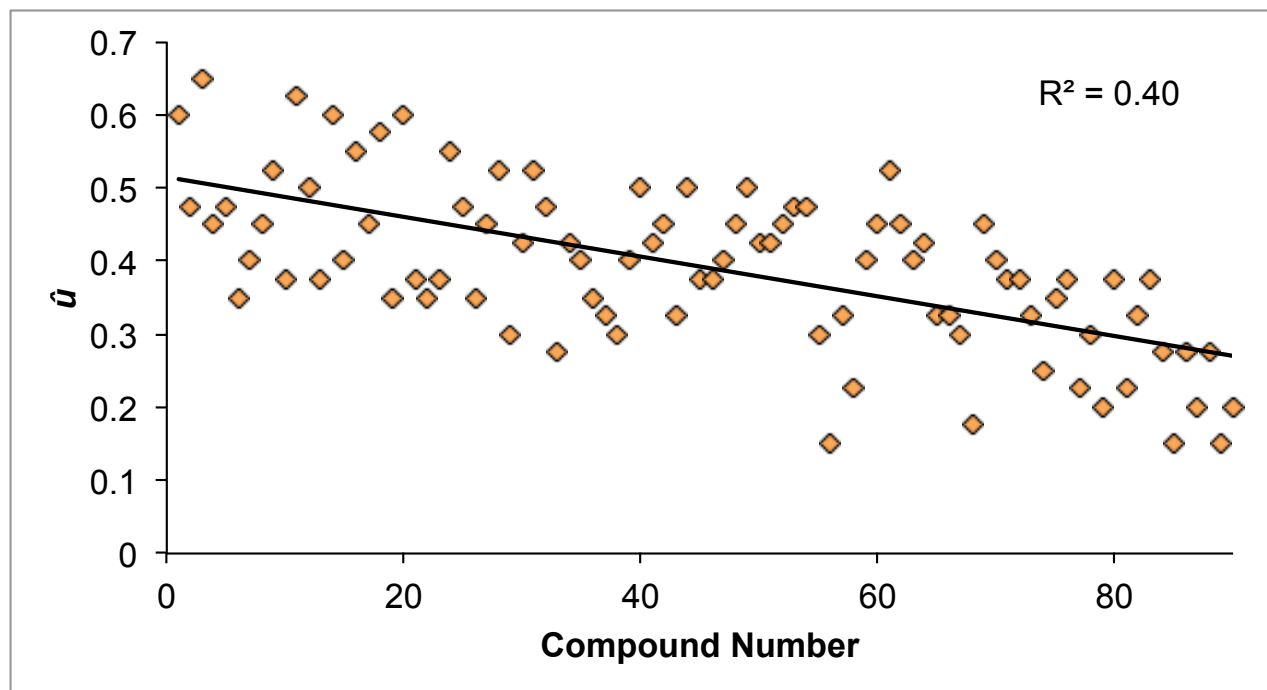

Figure 1: The metric accounting for hydrogen bond number and carbon number (eq. 17 of the main report) ordered by the maximum absolute error of a given compound (i.e., same order as Fig. 5 in the main report).

## References

- N. Adriaanse, H. Dekker, and J. Coops. Some physical constants of normal, saturated fatty acids and their methyl esters. *Recl. Trav. Chim. Pays-Bas*, 83:557, 1964.
- D. Ambrose and J. Walton. Vapour pressures up to their critical temperatures of normal alkanes and 1-alkanols. *Pure & Appl. Chem.*, 61:8:1395–1403, 1989.
- D.H. Andrews. The specific heats of some isomers of the type ortho, meta and para  $C_6H_4XY$  from 110 to 340 K. *Bulletin of the American Chemical Society*, 48:1287–1299, 1926.
- D.H. Andrews, G. Lynn, and J. Johnson. The heat capacities and heat of crystallisation of some isomeric aromatic compounds. *J. Am. Chem. Soc.*, 48(5):1274–1287, 1926.
- J.G. Aston, R.M. Kennedy, and S.C. Schumann. The heat capacity and entropy, heats of fusion and vaporisation and the vapor pressure of isobutane. *J. American Chem. Soc.*, 62:2059–2063, 1940.
- M. Bilde, B. Svenningsson, J. Mønster, and T. Rosenørn. Even-odd alteration of evaporation rates and vapor pressures of  $C_3$ - $C_9$  dicarboxylic acid aerosols. *Environ. Sci. Technol.*, 37:1371–1378, 2003.
- J. Birks and R.S. Bradley. The rate of evaporation of droplets .2. the influence of changes of temperature and of the surrounding gas on the rate of evaporation of drops of di-normal-butyl phthalate. *Proceedings of the Royal Society of London Series A-Mathematical and Physical Sciences*, 198(1053):226–239, 1949.
- A. M. Booth, M. H. Barley, D. O. Topping, G. McFiggans, A. Garforth, and C. J. Percival. Solid state and sub-cooled liquid vapour pressures of substituted dicarboxylic acids using Knudsen Effusion Mass Spectrometry (KEMS) and Differential Scanning Calorimetry. *Atmospheric Chemistry and Physics*, 10(10):4879–4892, May 2010. ISSN 1680-7324. doi: 10.5194/acp-10-4879-2010. URL <http://www.atmos-chem-phys.net/10/4879/2010/>.
- A.M. Booth, W.J. Montague, M.H. Barley, D.O. Topping, G. McFiggans, A. Garforth, and C.J. Percival. Solid state and sub-cooled liquid vapour pressures of cyclic aliphatic dicarboxylic acids. *Atmos. Chem. Phys.*, 11:655–665, 2011.
- A.M. Booth, T. Bannan, M.R. McGillen, M.H. Barley, D.O. Topping, G. McFiggans, and C.J. Percival. The role of *ortho*, *meta*, *para*, isomerism in measured solid state and derived sub-cooled liquid vapour pressures of substituted benzoic acids. *RSC Advances*, 2:4430–4443, 2012.
- H.K. Cammenga, F.W. Schulze, and W. Theuerl. Vapor pressure and evaporation coefficient of glycerol. *J. Chem. Eng. Data*, 22(2):131–134, 1977.
- M. Capouet and J.-F. Muller. A group contribution method for estimating the vapour pressures of  $\alpha$ -pinene oxidation products. *Atmospheric Chemistry and Physics*, 6: 1455–1467, 2006.
- S. Chattopadhyay and P.J. Ziemann. Vapor pressures of substituted and unsubstituted monocarboxylic and dicarboxylic acids measured using an improved thermal desorption particle beam mass spectrometry method. *Aerosol Science and Technology*, 39:11:1085–1100, 2005.
- R.D. Chirico, A. Nguyen, W.V. Steele, and M.M. Strube. Vapor pressure of *n*-alkanes revisited. new high-precision vapor pressure data on *n*-decane, *n*-eicosane, and *n*-octacosane. *J. Chem. Eng. Data*, 34:149–156, 1989.
- A. Cingolani and G. Berchiesi. Thermodynamic properties of organic compounds. *J. Thermal Analysis*, 6:87–91, 1974.
- M. Colomina. Propiedades termoquímicas de derivados del ácido benzoico. *Anales de Química*, 177:114–117, 1981.
- M.A.V. Ribeiro da Silva, M.A.R. Matos, M.J.S. Monte, D.M. Hillesheim, M.C.P.O. Marques, and N.F.T.G. Vieira. Enthalpies of combustion, vapour pressures, and enthalpies of sublimation of three methoxy-nitrobenzoic acids. vapour pressures and enthalpies of sublimation of the three nitrobenzoic acids. *J. Chem. Thermodynamics*, 31:1429–1441, 1999a.
- M.A.V. Ribeiro da Silva, M.J.S. Monte, and J.R. Ribeiro. Vapour pressures and the enthalpies and entropies of sublimation of five dicarboxylic acids. *J. Research of the National Bureau of Standards - A. Physics and Chemistry*, 80A(1):35–39, 1999b.

- M.A.V. Ribeiro da Silva, M.J.S. Monte, and J.R. Ribeiro. Thermodynamic study on the sublimation of succinic acid and of methyl- and dimethyl-substituted succinic and glutaric acids. *J. Chem. Thermodynamics*, 33:23–31, 2001.
- A. Dabrowska, A. Sporzynski, and S.P. Verevkin. Vapour pressures and enthalpies of vaporisation of a series of aromatic ethers of mono-, di- and triethylene glycol. *Fluid Phase Equilibria*, 249(1-2):115–119, 2006.
- H.G.M. de Wit, J.A. Bouwstra, J.G. Blok, and C.G. de Kruif. Vapor pressures and lattice energies of oxalic acid, mesotartaric acid, phloroglucinol, myoinositol, and their hydrates. *J. Chem. Physics*, 78(3):1470–1475, 1983.
- C.G. Dekruif, J. Voogd, and J.C.A. Offringa. Enthalpies of sublimation and vapor-pressures of 14 amino-acids and peptides. *J. Chem. Thermodynamics*, 11(7):651–656, 1979.
- E.S. Domalski and E.D. Hearing. Heat capacities and entropies of organic compounds in the condensed phase. volume iii. *J. Physical and Chemical Reference Data*, 25:1–525, 2006.
- J. Dykyi and M. Repas. *Saturation Vapor Pressure of Organic Compounds*. Veda Vydavatelstvo Slovenskej Akademie Vied, Bratislava, 1979.
- M.B. Ewing and J.C. Sanchez Ochoa. Vapour pressures of *n*-pentane determined by comparative ebulliometry. *J. Chem. Thermodynamics*, 38:289–295, 2006.
- A. Finch and J. Payne. Thermochemical study of 2,6-dinitrotoluene. *Thermochimica Acta*, 164:55–63, 1990.
- J.L. Flebbe, D.A. Barclay, and D.B. Manley. Vapor pressures of some C<sub>4</sub> hydrocarbons and their mixtures. *J. Chem. Eng. Data*, 27:405–412, 1982.
- B.R. Gaikwad and V.V. Subrahmanyam. Melting behavior of fatty alcohols and their binary blends. *J. Indian Chem. Soc.*, 62:513, 1985.
- J.L. Hales, R.C. Cogman, and W.J. Frith. A transpiration-glc apparatus for measurement of low vapor concentration. *J. Chem Thermodynamics*, 13(6):591–601, 1981.
- M. Hallquist, I. Wängberg, and E. Ljungström. Atmospheric fate of carbonyl oxidation products originating from  $\alpha$ -pinene and  $\Delta^3$ -carene: Determination of rate of reaction with OH and NO<sub>3</sub> radicals, UV absorption cross sections, and vapor pressures. *Environ. Sci. Technol.*, 31:3166–3172, 1997.
- A. Heintz, S. Kapteina, and S.P. Verevkin. Pairwise-substitution effects and intramolecular hydrogen bonds in nitrophenols and methylnitrophenols. thermochemical measurements and ab initio calculations. *Journal of Physical Chemistry A*, 111(28):6552–6562, 2007.
- H. Huang, Z. Zeng, W. Xue, and W. Zhu. Solubility of terephthalic acid in the reaction system oligomeric bis(hydroxy)butyl terephthalates-1,4-butanediol. *Polymer Engineering and Science*, 49:819–823, 2009.
- S. Kapteina, K. Slowik, S.P. Verevkin, and A. Heintz. Vapor pressures and vaporization enthalpies of a series of ethanolamines. *J. Chem. Eng. Data*, 50:398–402, 2005.
- J. Kendall and W.A. Gibbons. The addition compounds of aldehydes and ketones with organic acids. *J. Am. Chem. Soc.*, 37:149–162, 1915.
- H. Kratzke. Thermodynamic quantities for propane 1. the vapour pressure of liquid propane. *J. Chem. Thermodynamics*, 12:305–309, 1980.
- A.L.C. Lagoa, H.P. Diogo, and M.E. Minas da Piedade. Energetics of the C-Cl bond in CH<sub>3</sub>CH(Cl)COOH. enthalpy of formation of (S)-(-)-2-chloropropionic acid and of the 1-carboxyethyl radical. *J. Phys. Chem. A*, 106:9855–9861, 2002.
- Y.D. Lei, F. Wania, W.Y. Shiu, and D.G.B. Boocock. Temperature dependent vapor pressures of chlorinated catechols, syringols, and syringaldehydes. *J. Chem. Eng. Data*, 44:200–202, 1999.
- A.B. Macknick and J.M. Prausnitz. Vapor pressures of high-molecular-weight hydrocarbons. *J. Chem. Eng. Data*, 24(3):175–178, 1979.
- J.A. Martínez-Ortiz and D.B. Manley. Vapor pressures for the system isobutane-isobutylene-*n*-butane. *J. Chem. Eng. Data*, 23(2):165–167, 1978.
- J. Mønster, T. Rosenørn, B. Svenningsson, and M. Bilde. Evaporation of methyl- and dimethyl-substituted malonic, succinic, glutaric and adipic acid particles at ambient temperatures. *J. Aerosol Science*, 35:1453–1465, 2004.

- M.J.S. Monte and D.M. Hillesheim. Thermodynamic study on the sublimation of 3-phenylpropionic acid and of three methoxy-substituted 3-phenylpropionic acids. *J. Chem. Thermodynamics*, 33(8):837–847, 2001.
- D.L. Morgan and R. Kobayashi. Direct vapor pressures measurements of ten n-alkanes in the  $c_{10}$ - $c_{28}$  range. *Fluid Phase Equilibria*, 97:211–242, 1994.
- O. Noll. Vapor pressures and liquid densities of n-methylethanolamine, diethanolamine, and n-methyldiethanolamine. *ELDATA: The International Electronic Journal of Physico-Chemical Data*, 4(3):105–120, 1998.
- D.V. Parke and R.T. Williams. Studies in detoxication. 63. metabolism of halogenbenzenes .a. meta-diclorobenzene .b. further observations on the metabolism of chlorobenzene. *Biochemical Journal*, 59(3):415–422, 1955.
- P.A. Pella. Measurement of the vapour pressures of tnt, 2,4-dnt, 2,6-dnt, and egdn. *J. Chem. Thermodynamics*, 9:301–305, 1977.
- U.S. Rai and K.D. Mandal. Chemistry of organic eutectics - para-phenylenediamine-m-nitrobenzoic acid system involving the 1-2 addition compound. *Bulletin of the Chemical Society of Japan*, 63(5):1496–1502, 1990.
- R.C. Reid, J.M. Prausnitz, and B.E. Poling. *The Properties of Gases and Liquids*. McGraw-Hill, New York and London, 4 edition, 1987.
- M.V. Roux, M. Temprado, and J.S. Chickos. Vaporization, fusion and sublimation enthalpies of the dicarboxylic acids from  $C_4$  to  $C_{14}$  and  $C_{16}$ . *J. Chem. Thermodynamics*, 37:941–953, 2005.
- M.V. Roux, R. Notario, E. Velez, M. Temprado, A. Guerrero, S.P. Verevkin, J. Quijano, and J. Gaviria. Experimental and computational thermochemical study of 3-hydroxypropanenitrile. *J. Chem. Thermodynamics*, 39(10):1377–1383, 2007.
- R.C.F. Schaake, J.C. van Miltenburg, and C.G. de Kruif. Thermodynamic properties of the normal alkanic acids i. molar heat capacities of seven odd-numbered normal alkanic acids. *J. Chem. Thermodynamics*, 14:763–769, 1982a.
- R.C.F. Schaake, J.C. van Miltenburg, and C.G. de Kruif. Thermodynamic properties of the normal alkanic acids i. molar heat capacities of seven even-numbered normal alkanic acids. *J. Chem. Thermodynamics*, 14:771–778, 1982b.
- S.C. Schumann, J.G. Aston, and M. Sagenkahn. The heat capacity and entropy, heats of fusion and vaporization and the vapor pressures of isopentane. *J. American Chem. Soc.*, 64:1039–1043, 1942.
- V.V. Serpinskii, S.A. Voitkevich, and N.Y. Lyuboshitz. Determination of saturated vapour pressures of fragrances. *Zhurnal Fizicheskoi Khimii*, 27:1032–1038, 1953.
- V.V. Serpinskii, S.A. Voitkevich, and N.Y. Lyuboshitz. Opredelenie davleniya nasyschennogo para nekotorykh dushistykh veshchestv .3. *Zhurnal Fizicheskoi Khimii*, 28(11):1969–1974, 1954.
- V.V. Serpinskii, S.A. Voitkevich, and N.Y. Lyuboshits. Determination of saturated vapour pressure of some aromatic principles. *Zhurnal Fizicheskoi Khimii*, 29(4):653–657, 1955.
- V.V. Serpinskii, S.A. Voitkevich, and N.Y. Lyuboshitz. Determination of the saturated vapor pressures of some odorous substances .6. *Zhurnal Fizicheskoi Khimii*, 31(6):1278–1284, 1957.
- V.V. Serpinskii, S.A. Voitkevich, and N.Y. Lyuboshits. Results of determination of pressures of saturated vapour of 36 aromatic substances. *Trudy Vsesoyuz. Nauch.-Issledovatel. Inst. Sintet.i Natural. Dushistykh Veshchestv*, 4:125–130, 1958.
- M.P. Shevelyova, D.H. Zaitsau, Y.U. Paulechka, and G.J. Kabo. Thermodynamics of 2-(1'-hydroxycyclohexyl)cyclohexane: Vaporization, sublimation, and the ideal gas state thermodynamic properties. *J. Chem. Eng. Data*, 51:1946–1952, 2006.

- M. Skerget, L. Cretnik, Z. Knez, and M. Skrinjar. Influence of the aromatic ring substituents on phase equilibria of vanillins in binary systems with CO<sub>2</sub>. *Fluid Phase Equilibria*, 231(1):11–19, 2005.
- W.L. Song, A. Li, and X.Q. Xu. Water solubility enhancement of phthalates by cetyltrimethylammonium bromide and beta-cyclodextrin. *Industrial & Engineering Chemistry Research*, 42(5):949–955, 2003.
- W.V. Steele, R.D. Chirico, A.B. Cowell, S.E. Knipmeyer, and A. Nguyen. Thermodynamic properties and ideal-gas enthalpies of formation for 1,4-diisopropylbenzene, 1,2,4,5-tetraisopropylbenzene, cyclohexane oxime, dimethyl malonate, glutaric acid, and pimelic acid. *J. Chem. Eng. Data*, 47:725–739, 2002.
- G.C. Straty and R. Tsumura. P<sub>v</sub>t and vapor pressure measurements on ethane. *J. Research of the National Bureau of Standards - A. Physics and Chemistry*, 80A(1):35–39, 1976.
- D. Varhanickova, S.C. Lee, W. Shiu, and D. Mackay. Aqueous solubilities of chlorocatechols, chlorovanillins, chlorosyringols, and chlorosyringaldehydes at 25-degrees-c. *J. Chem. Eng. Data*, 40:620–622, 1958.
- T.V. Vasiltsova, S.P. Verevkin, E. Birch, and A. Heintz. Thermodynamic properties of mixtures containing ionic liquids. activity coefficients of ethers and alcohols in 1-methyl-3-ethyl-imidazolium bis(trifluoromethyl-sulfonyl) imide using the transpiration method. *J. Chem. Eng. Data*, 50:142–148, 2005.
- S.P. Verevkin. Thermochemistry of nitro compounds. experimental standard enthalpies of formation and improved group-additivity values. *Thermochimica Acta*, 307:17–25, 1997.
- S.P. Verevkin. Determination of vapour pressures and enthalpies of vaporisation of 1,2-alkanediols. *Fluid Phase Equilibria*, 224:23–29, 2004.
- S.P. Verevkin. Vapor pressures and enthalpies of vaporization of a series of the 1,3-alkanediols. *J. Chem. Eng. Data*, 52:301–308, 2007.
- S.P. Verevkin and C. Schick. Determination of vapour pressures, enthalpies of sublimation, enthalpies of vaporisation, and enthalpies of fusion of a series chloro-aminobenzenes and chloro-nitrobenzenes. *Fluid Phase Equilibria*, 211(2):161–177, 2003.
- S.P. Verevkin, A.V. Toktonov, Y. Chernyak, B. Schäffner, and A. Börner. Vapour pressure and enthalpy of vaporization of cyclic alkaline carbonates. *Fluid Phase Equilibria*, 268(1-2):1–6, 2008.
- A.L. Woodman and A. Adicoff. Vapor pressure of triacetin, triethylene glycol denigrate and metriol trinitrate. *J. Chem. Eng. Data*, 8:241–242, 1963.
